# Supplementary material for: High-performance humidity sensors based on electrospinning ZnFe2O4 nanotubes
Source: Royal Society of Chemistry journal article supplement (doi:10.1039/c5ra09903j), 2015-01-01
Supplement: c5ra09903j1.pdf [file c5ra09903j1.pdf]

## Electronic supplementary information

### High-Performance Humidity Sensors Based on electrospinning

#### ZnFe<sub>2</sub>O<sub>4</sub> Nanotubes

Ming Zhuo,<sup>a</sup> Ting Yang,<sup>b</sup> Tao Fu,<sup>b</sup> and Qihong Li<sup>\*c</sup>

Received (in XXX, XXX) Xth XXXXXXXXXX 20XX, Accepted Xth XXXXXXXXXX 20XX

DOI: 10.1039/b000000x

<sup>a</sup>College of Electrical and Information Engineering, Hunan University, Changsha, 410082 China.

<sup>b</sup>School of Physics and Electronics, Hunan University, Changsha, 410082 China.

<sup>c</sup>Pen-Tung Sah Institute of Micro-Nano Science and Technology, Xiamen University, Xiamen

361000, E-mail:liqihong2004@hotmail.com. Tel.: +86 0731 88664019; Fax: +86 0731 88822137.

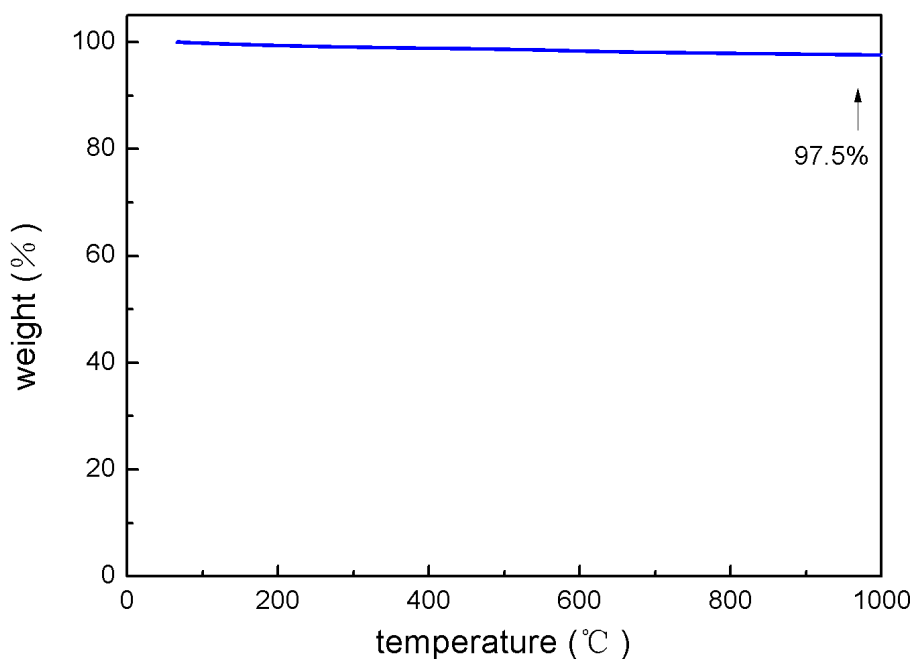

Figure S1. TGA curve of the ZnFe<sub>2</sub>O<sub>4</sub> nanotubes in air ranging from room temperature to 1000 °C.

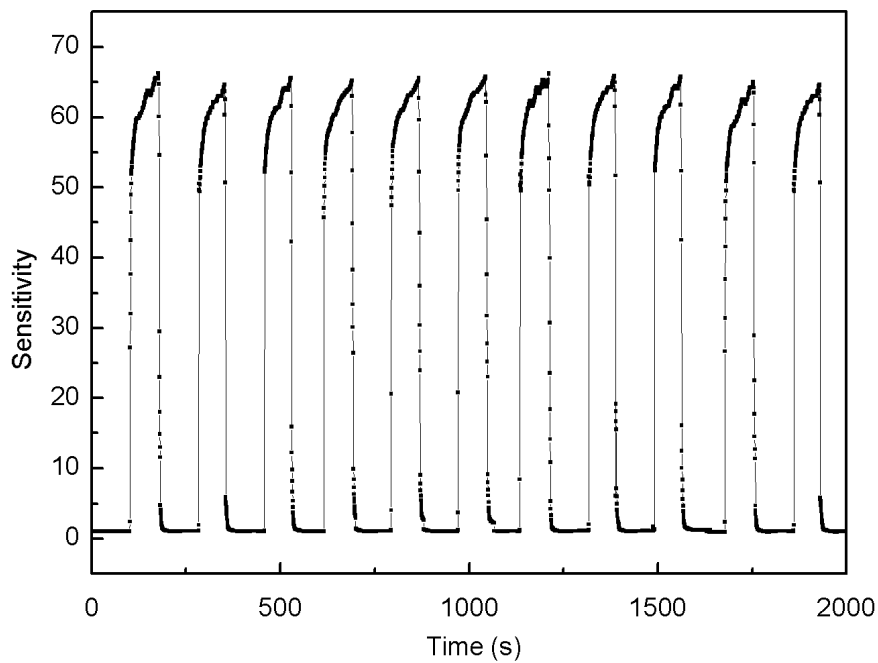

Figure S2. Eleven cycles of the sensitivity response with RH ranging from 75% to 35%.

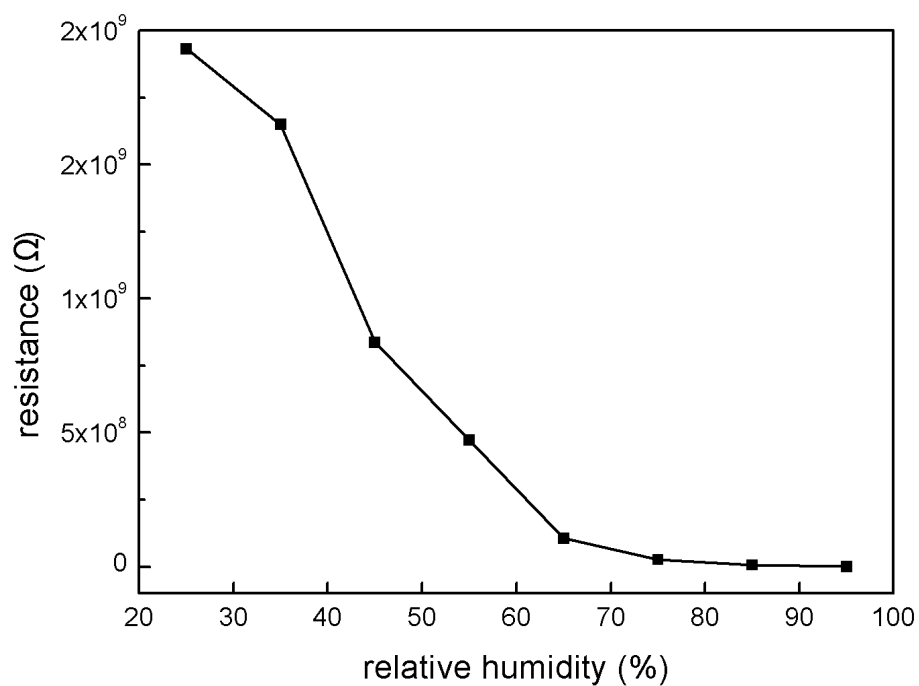

Figure S3. Resistance of the humidity sensor under each RH, that is 25%, 35%, 45%, 55%, 65%, 75%, 85% and 95%..

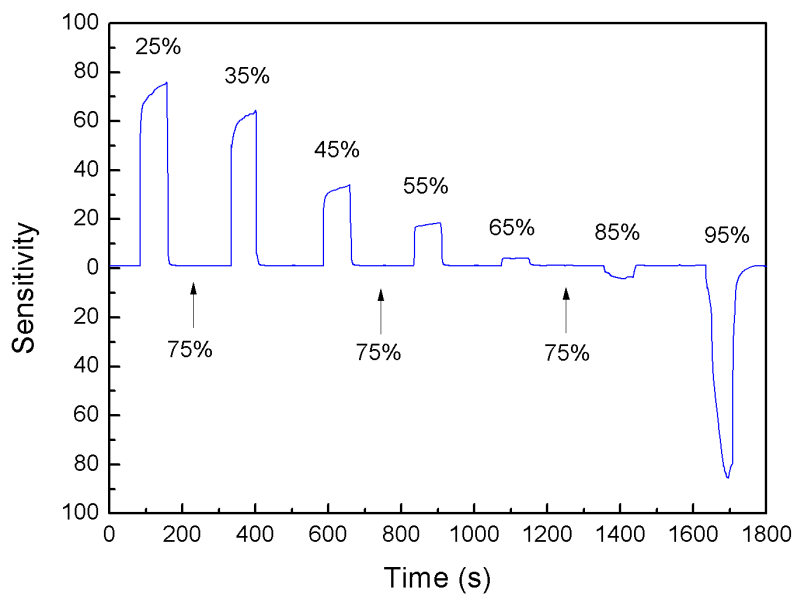

Figure S4. The real-time sensitivity response with different RHs after 6 months.
